# Supplementary material for: Application of HPTLC Multiwavelength Imaging and Color Scale Fingerprinting Approach Combined with Multivariate Chemometric Methods for Medicinal Plant Clustering According to Their Species
Source: MDPI journal article supplement (doi:10.3390/molecules26237225), 2021-11-29
Supplement: s1 [file s1]

# Application of HPTLC multi-wavelength imaging and color scale fingerprinting approach combined with multivariate chemometric methods for medicinal plant clustering according to their species

Simona Codruța Aurora Cobzac<sup>1,2</sup>, Neli Kinga Olah<sup>3,4</sup>, Dorina Casoni<sup>1,2,\*</sup>

<sup>1</sup> Babeș-Bolyai University, Faculty of Chemistry and Chemical Engineering, Department of Chemistry, Arany János, No. 11, Cluj-Napoca, România

<sup>2</sup> Research Center for Advanced Chemical Analysis, Instrumentation and Chemometrics – ANALYTICA, Babeș-Bolyai University 11 Arany Janos str., RO-400028, Cluj-Napoca, Romania

<sup>3</sup> "Vasile Goldis" Western University of Arad, Faculty of Pharmacy, 86 L. Rebreanu str., Arad, Romania

<sup>4</sup> SC PlantExtrakt SRL, 407059 Rădaia, Cluj, Romania

\* Correspondence: [dorina.casoni@ubbcluj.ro](mailto:dorina.casoni@ubbcluj.ro); Tel.: +40-264-590818

Plate  
number

1

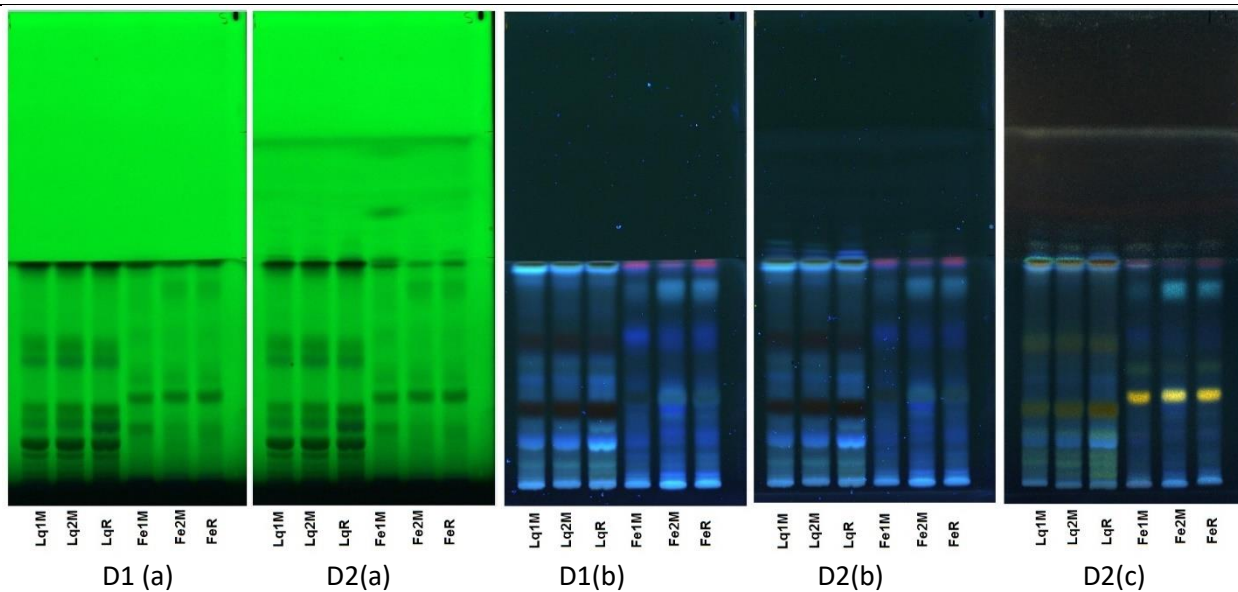

2

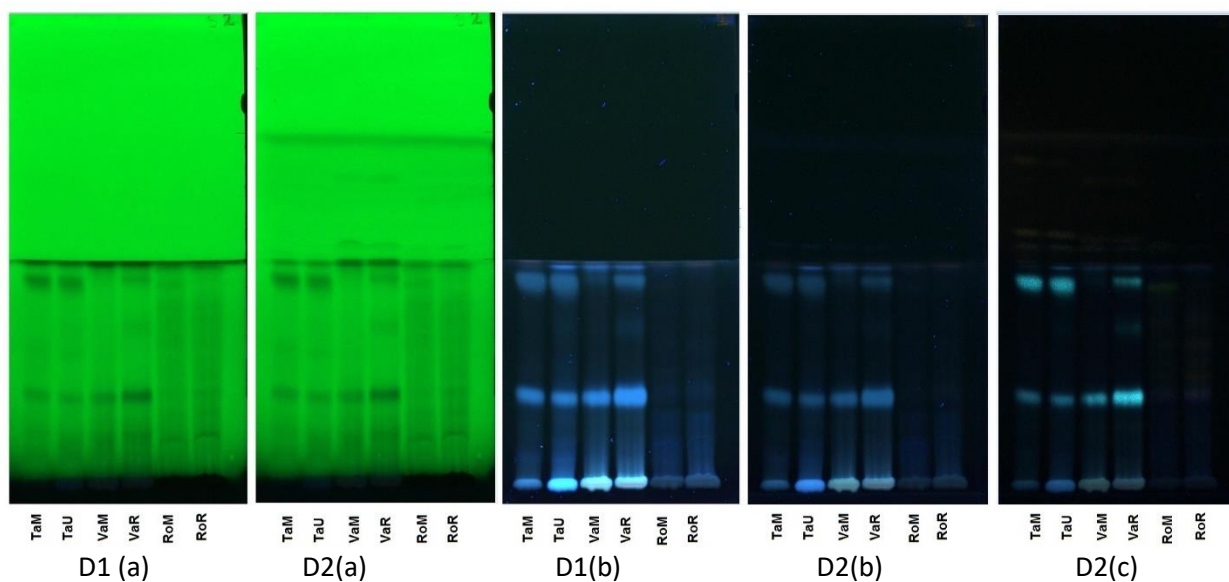

3

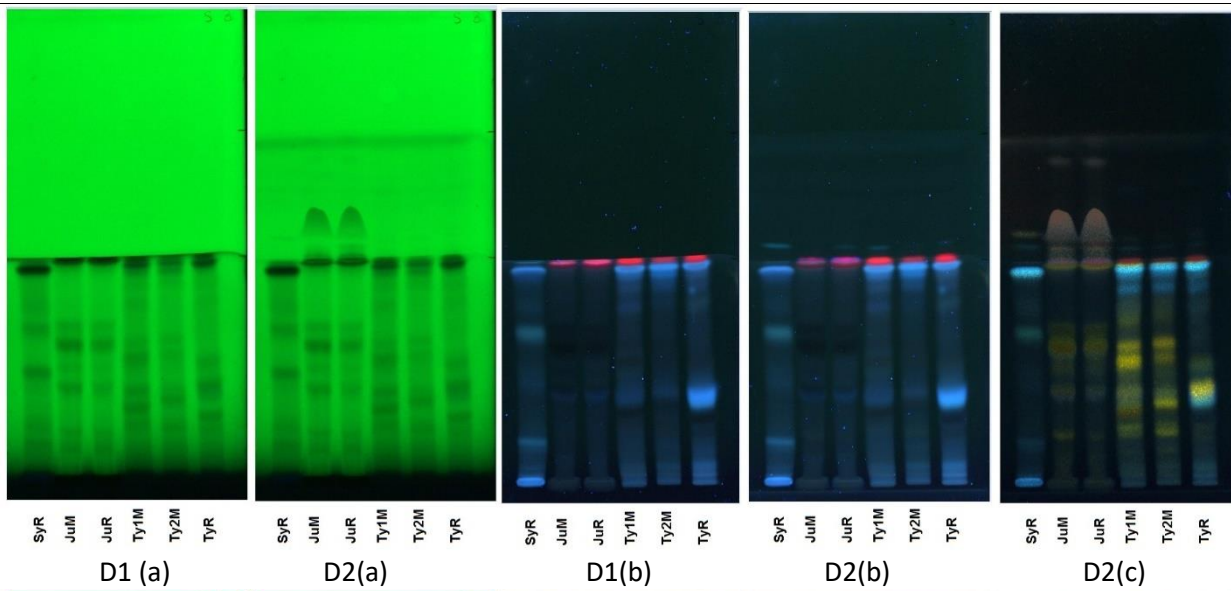

4

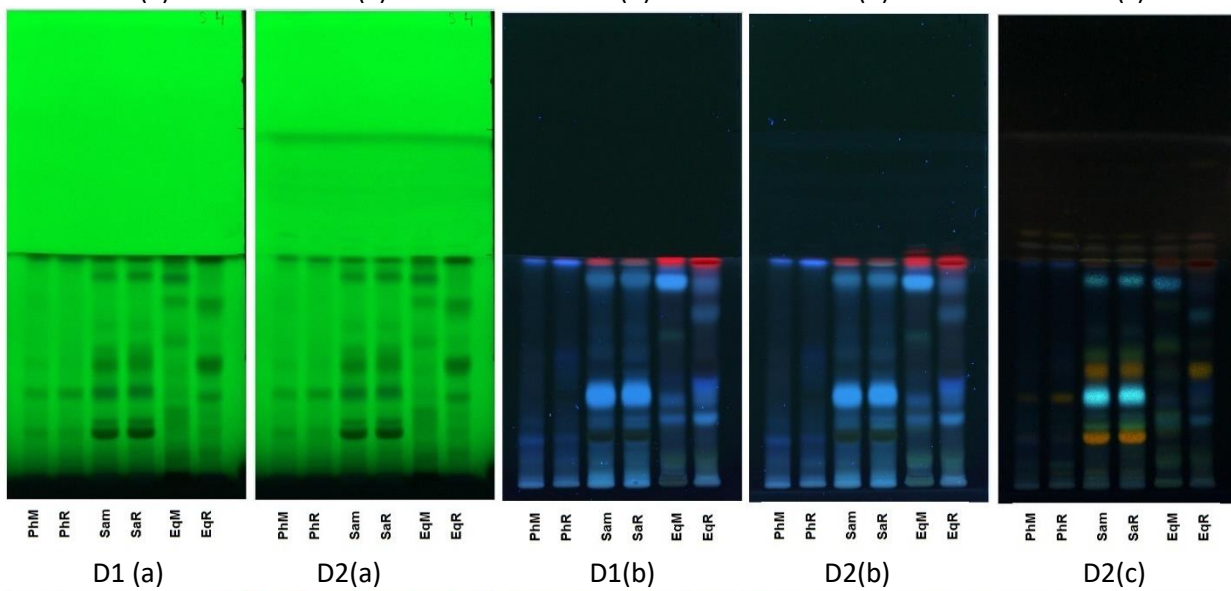

5

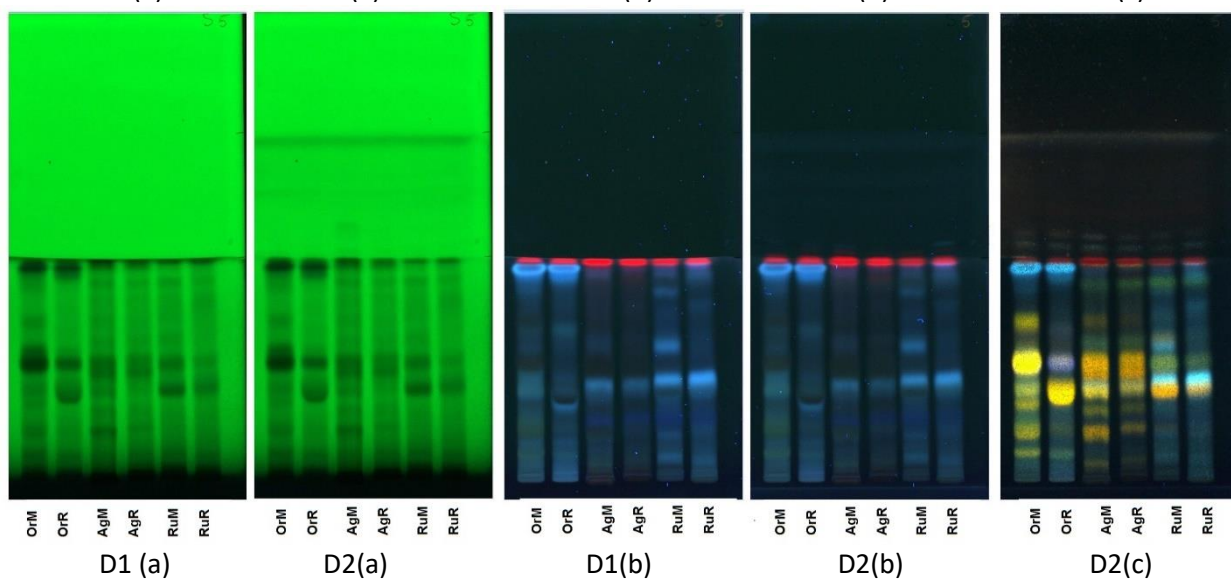

6

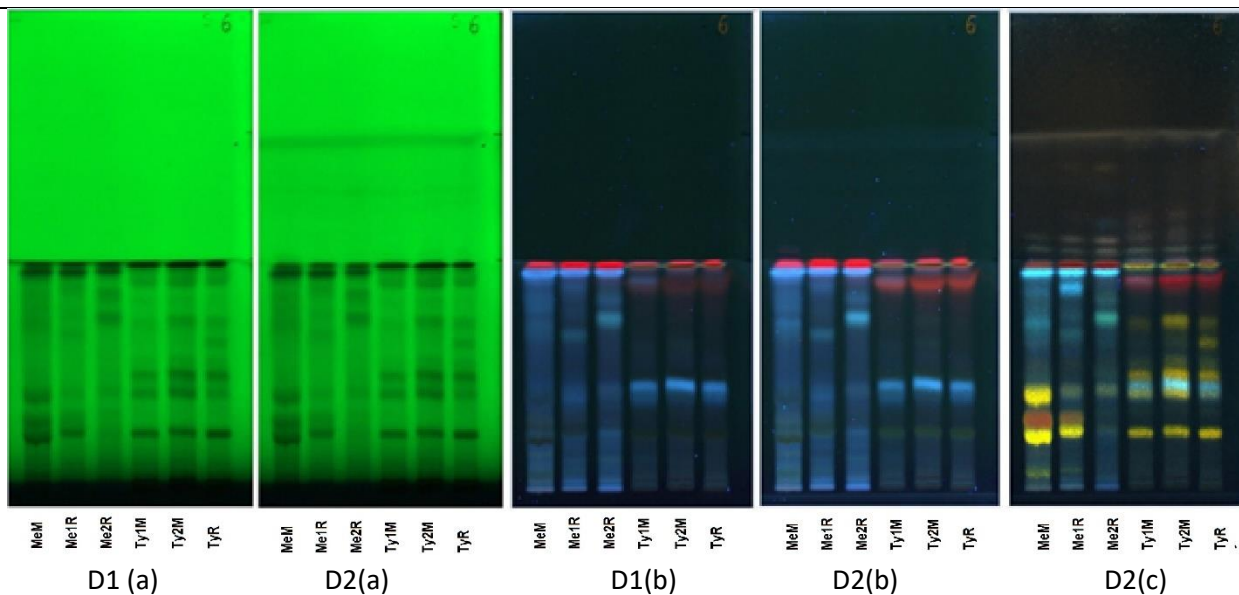

7

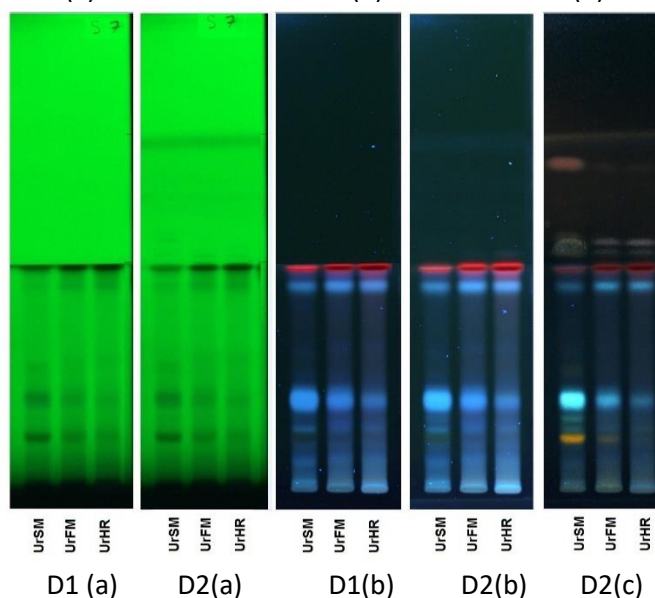

**Figure S1.** The images of the chromatographic plates (HPTLC Silica gel 60 F<sub>254</sub> plates numbered from 1 to 7) including all the analyzed medicinal plants extracts (corresponding name of the plants - in Table 1) obtained after first development (D1) using ethyl acetate - formic acid - water (80:10:10 v/v/v) as mobile phase and second development (D2) using toluene - ethyl acetate (95: 5, v/v) as mobile phase respectively; visualization (from left to right side) by fluorescence quenching under 254 nm (a), fluorescence at 365 nm (b) and at 365 nm after derivatization (c).
